# Supplementary material
Source: HighWire-hosted journal article supplement (https://www.cmajopen.ca/highwire/filestream/81047/field_highwire_adjunct_files/0/2017-0110-1-at.pdf)
Supplement: 2017-0110-1-at.pdf [file 2017-0110-1-at.pdf]

**Appendix 1 (as supplied by the authors):** Supplementary material

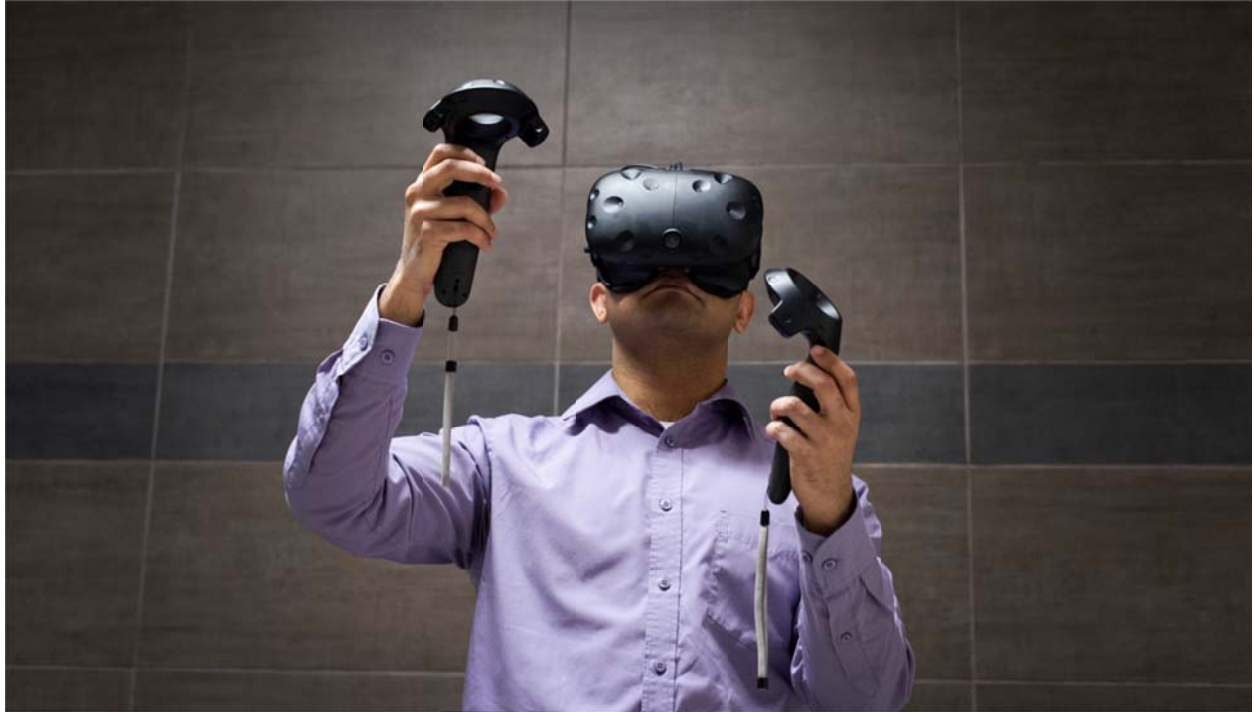

Representative depiction of the virtual-reality hardware. The participant was able to interact with the virtual-reality brain presented via the headset using two handheld remotes. Image taken by the Department of Surgery at the University of Saskatchewan, used with permission.

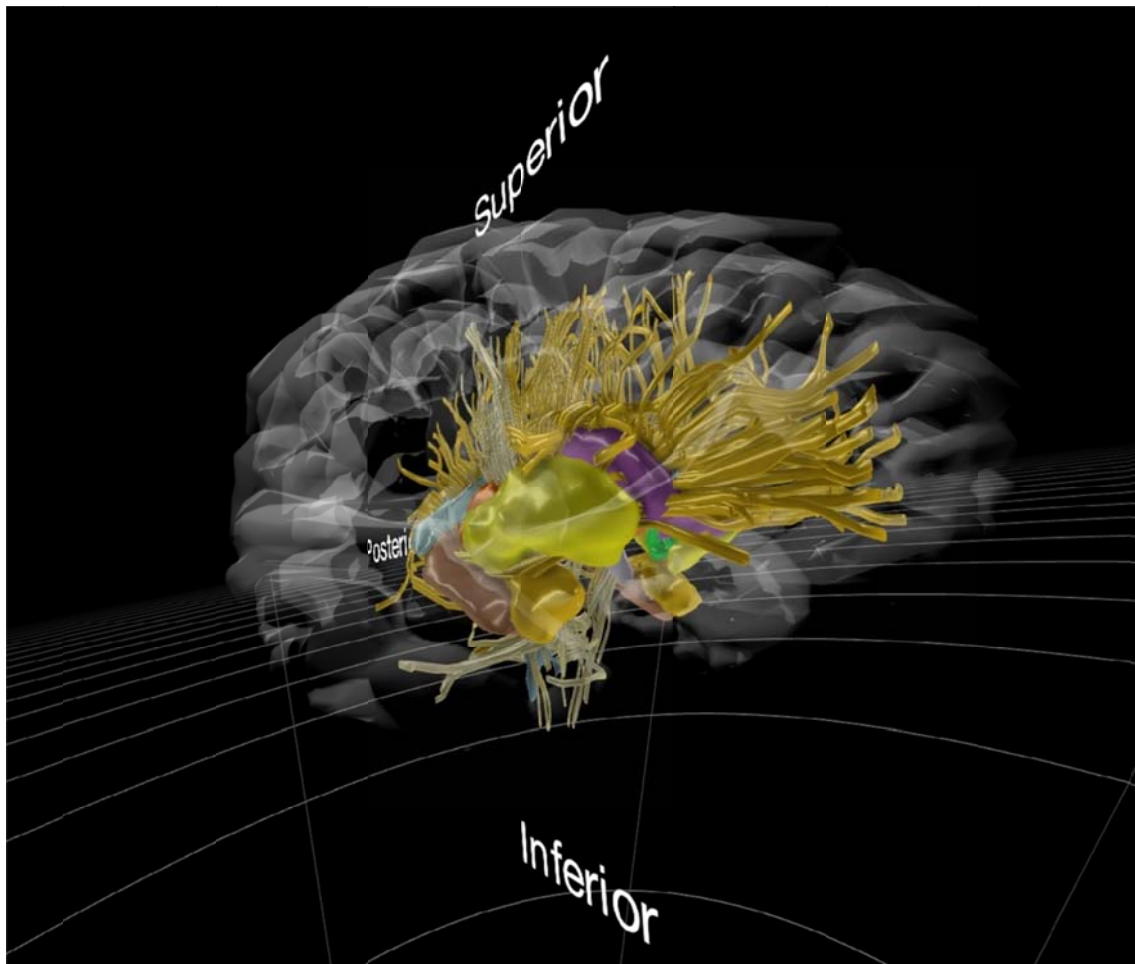

Example of the virtual-reality brain within the virtual-reality environment. Visibility of the structures and their identity could be toggled by the participant.

## Baseline-test 'Test' Questions

1. Which structure is most lateral?
  - a. Caudate
  - b. Putamen**
  - c. Globus pallidus internus
2. Which structure is most superior?
  - a. Thalamus
  - b. Globus pallidus
  - c. Putamen
  - d. Caudate**
3. The most lateral portion of the basal ganglia is called the \_\_\_\_\_.
  - a. Putamen**
  - b. Thalamus
  - c. Globus pallidus
  - d. Caudate
4. The globus pallidus is \_\_\_\_\_ the size of the thalamus.
  - a. larger than
  - b. smaller than**
  - c. equal to
5. The third ventricle is \_\_\_\_\_ to the thalamus.
  - a. medial**
  - b. lateral
  - c. superior
  - d. inferior
6. Select the most inferior structure from the list below.
  - a. Caudate
  - b. Putamen
  - c. Amygdala**
  - d. Globus pallidus
7. The globus pallidus is \_\_\_\_\_ to the amygdala
  - a. Superior**
  - b. Lateral
  - c. Inferior
  - d. Medial
8. Which structure is most inferior?
  - a. Third ventricle
  - b. Fourth ventricle**
  - c. Lateral ventricle

9. The amygdala is \_\_\_\_\_ to the hippocampus
- Anterior**
  - Posterior
  - Medial
  - Lateral
10. In Huntington's disease, the lateral ventricle will have an abnormal concave shape, which is due to the atrophy of the \_\_\_\_\_, which runs along the lateral ventricle?
- Thalamus
  - Caudate**
  - Subthalamic nucleus
  - Putamen
11. If a bullet pierced a patient's thalamus, you may be worried that it also injured the \_\_\_\_\_.
- Subthalamic nucleus
  - Putamen
  - Third ventricle**
  - Globus pallidus
12. If you know that a gunshot would entered the side of a patient's skull and pierced through their lateral ventricle, you may be relieved that the structure lying inferior and posteriorly, the \_\_\_\_\_, was spared.
- Putamen
  - Thalamus**
  - Caudate
  - Fourth ventricle

#### Baseline-test 'Control' Questions

- The cingulate gyrus is \_\_\_\_\_ to the third ventricle
  - Inferior
  - Lateral
  - Superior**
- The entorhinal cortex is \_\_\_\_\_ to the globus pallidus
  - Superior
  - Lateral
  - Inferior**
- Which structure is most medial?
  - Parahippocampal gyrus**
  - Inferior temporal gyrus

4. Which structure is located most superior?
  - a. Pons
  - b. Medulla
  - c. Midbrain**
  
5. The inferior olive is located \_\_\_\_\_ to the pyramid
  - a. Lateral**
  - b. Medial
  - c. Superior
  
6. Which structure is located superior to the lateral geniculate body?
  - a. Superior cerebellar peduncle
  - b. Pyramid
  - c. Thalamus**
  - d. Olive
  
7. The septum pellucidum divides which structures?
  - a. Mammillary bodies
  - b. Lateral ventricles**
  - c. Left and right cerebral cortex
  
8. The red nucleus is located \_\_\_\_\_ to the substantia nigra
  - a. Superior**
  - b. Inferior
  
9. Which structure is most medial?
  - a. Inferior frontal gyrus
  - b. Body of the fornix**
  - c. Uncus
  - d. Insula

#### Post-intervention 'Test' Questions

1. Which structure is most medial?
  - a. Globus pallidus
  - b. Putamen
  - c. Thalamus**
  - d. Caudate
  
2. Which structure is located medial to the globus pallidus?
  - a. Caudate
  - b. Putamen
  - c. Thalamus**
  
3. The C-shaped structure connected to the putamen via cellular bridges is the \_\_\_\_\_.
  - a. Caudate**

- b. Putamen
  - c. Thalamus
  - d. Globus pallidus
4. The corticospinal tracts are \_\_\_\_\_ to the spinothalamic tracts
    - a. Anterior**
    - b. Posterior
  5. The fourth ventricle is \_\_\_\_\_ to the third ventricle.
    - a. anterior
    - b. posterior
    - c. superior
    - d. inferior**
  6. The globus pallidus is \_\_\_\_\_ to the amygdala.
    - a. anterior
    - b. posterior
    - c. superior**
    - d. inferior
  7. The lateral ventricles are \_\_\_\_\_ to the head of the caudate.
    - a. Medial**
    - b. Lateral
    - c. Superior
    - d. Inferior
  8. If you were to swim from the third ventricle into a lateral ventricle, you would see which structures bulging inward into the ventricle and forming its lateral wall as you proceeded to swim posteriorly?
    - a. Amygdala and internal capsule
    - b. Thalamus and Caudate**
    - c. Subthalamic nucleus and putamen
    - d. Thalamus and globus pallidus
  9. The hippocampus is located \_\_\_\_\_ to the putamen
    - a. Superior
    - b. Inferior**
    - c. Anterior
    - d. Posterior
  10. An abscess located in the putamen may also affect which structure that lies immediately medial to the putamen?
    - a. Thalamus
    - b. Caudate
    - c. Globus pallidus**

11. If a patient received a gun shot wound to their frontal lobe and you knew that their lateral ventricle was injured, you might be worried that the bullet injured the \_\_\_\_\_ on the same side.
  - a. Fourth ventricle
  - b. Putamen
  - c. Caudate**
  - d. Amygdala
  
12. The posterior aspect of the hippocampus is \_\_\_\_\_ to the thalamus
  - a. Anterior
  - b. Posterior**
  - c. Medial
  - d. Lateral

#### Post-intervention Control Questions

1. The \_\_\_\_\_ connects the third and fourth ventricle
  - a. Interventricular foramen of Monroe
  - b. Central canal
  - c. Cerebral aqueduct**
  - d. Foramen of Magendie
  
2. The pineal body is \_\_\_\_\_ to the cerebellum
  - a. Superior**
  - b. Lateral
  - c. Inferior
  
3. The mammillary bodies are located \_\_\_\_\_ to the uncus
  - a. Lateral
  - b. Superior
  - c. Medial**
  - d. Inferior
  
4. The sylvian fissure runs inferior to the \_\_\_\_\_
  - a. Inferior frontal gyrus**
  - b. Superior temporal gyrus
  - c. Occipital gyri
  - d. Angular gyrus
  
5. The supraoptic nucleus is located \_\_\_\_\_ to the corpus callosum
  - a. Superior
  - b. Inferior**
  
6. Which structure is located lateral to the claustrum?
  - a. Optic tract
  - b. Third ventricle

- c. Insula**
  - d. Corpus callosum
  
- 7. The orbital gyri are located \_\_\_\_\_ to the gyrus rectus
  - a. Lateral**
  - b. Medial
  - c. Superior
  - d. Inferior
  
- 8. The falx cerebri separates which structures
  - a. Mammillary bodies
  - b. Lateral ventricles
  - c. Left and right cerebral cortex**
  
- 9. The corona radiata lies \_\_\_\_\_ to the Sylvian fissure
  - a. Lateral
  - b. Medial**



### Satisfaction survey

| Question                                                                                                   | Group       | Neither Agree Nor Disagree |            |            |                   |            |
|------------------------------------------------------------------------------------------------------------|-------------|----------------------------|------------|------------|-------------------|------------|
|                                                                                                            |             | Strongly Agree             | Agree      | Disagree   | Strongly Disagree |            |
| <b>This method is useful at learning about spatial relations of the thalamus</b>                           | VR          | 23 (74.2%)                 | 8 (25.8%)  | 0          | 0                 | 0          |
|                                                                                                            | Paper-based | 0                          | 20 (60.6%) | 6 (18.2%)  | 7 (21.2%)         | 0          |
| <b>This method was efficient in teaching spatial understanding of the thalamus</b>                         | VR          | 20 (64.5%)                 | 11 (35.5%) | 0          | 0                 | 0          |
|                                                                                                            | Paper-based | 0                          | 13 (39.4%) | 6 (18.2%)  | 13 (39.4%)        | 1 (3%)     |
| <b>This method should be used in the curriculum</b>                                                        | VR          | 19 (61.3%)                 | 10 (32.3%) | 2 (6.5%)   | 0                 | 0          |
|                                                                                                            | Paper-based | 0                          | 11 (33.3%) | 17 (51.5%) | 4 (12.1%)         | 1 (3%)     |
| <b>This method was easy to use and get used to</b>                                                         | VR          | 20 (64.5%)                 | 10 (32.3%) | 1 (3.2%)   | 0                 | 0          |
|                                                                                                            | Paper-based | 1 (3.0%)                   | 22 (66.7%) | 3 (9.1%)   | 5 (15.2%)         | 2 (6.1%)   |
| <b>This method was fun</b>                                                                                 | VR          | 25 (80.6%)                 | 5 (16.1%)  | 1 (3.2%)   | 0                 | 0          |
|                                                                                                            | Paper-based | 0                          | 0          | 11 (33.3%) | 16 (48.5%)        | 6 (18.2%)  |
| <b>This method has the potential to replace in class lectures</b>                                          | VR          | 4 (12.9%)                  | 9 (29.0%)  | 9 (29.0%)  | 8 (25.8%)         | 1 (3.2%)   |
|                                                                                                            | Paper-based | 0                          | 3 (9.1%)   | 5 (15.2%)  | 14 (42.4%)        | 11 (33.3%) |
| <b>I feel I had enough time to learn about the neuroanatomical structures</b>                              | VR          | 2 (6.5%)                   | 12 (38.7%) | 8 (25.8%)  | 9 (29.0%)         | 0          |
|                                                                                                            | Paper-based | 0                          | 2 (6.1%)   | 3 (9.1%)   | 16 (48.5%)        | 12 (36.4%) |
| <b>I feel I have a better understanding of the spatial relationships of the neuroanatomical structures</b> | VR          | 20 (64.5%)                 | 11 (35.5%) | 0          | 0                 | 0          |
|                                                                                                            | Paper-based | 0                          | 22 (66.7%) | 7 (21.2%)  | 3 (9.1%)          | 1 (3%)     |
| <b>I feel more confident in being able to engage in learning neuroanatomy</b>                              | VR          | 13 (41.9%)                 | 16 (51.6%) | 2 (6.5%)   | 0                 | 0          |
|                                                                                                            | Paper-based | 0                          | 15 (45.5%) | 10 (30.3%) | 7 (21.2%)         | 1 (3%)     |
| <b>I feel that I will be able to retain this information for the future</b>                                | VR          | 4 (12.9%)                  | 16 (51.6%) | 7 (22.6%)  | 4 (12.9%)         | 0          |
|                                                                                                            | Paper-based | 1 (3.0%)                   | 7 (21.2%)  | 11 (33.3%) | 11 (33.3%)        | 3 (9.1%)   |
|                                                                                                            | VR          | 8 (25.8%)                  | 17 (54.8%) | 2 (6.5%)   | 4 (12.9%)         | 0          |

| Question                                                                                                                      | Group       | Strongly Agree | Agree      | Neither Agree<br>Nor Disagree | Disagree   | Strongly Disagree |
|-------------------------------------------------------------------------------------------------------------------------------|-------------|----------------|------------|-------------------------------|------------|-------------------|
| <b>I feel less afraid with the complexity of neuroanatomy</b>                                                                 | Paper-based | 0              | 4 (12.9%)  | 10 (30.3%)                    | 16 (48.5%) | 3 (9.1%)          |
| <b>This method can promote and enhance self-directed learning</b>                                                             | VR          | 21 (67.7%)     | 10 (32.3%) | 0                             | 0          | 0                 |
|                                                                                                                               | Paper-based | 0              | 11 (33.3%) | 7 (21.2%)                     | 12 (36.4%) | 2 (6.1%)          |
| <b>Being able to interact with and manipulate the neuroanatomical structures helped me to engage in learning the material</b> | VR          | 23 (74.2%)     | 8 (25.8%)  | 0                             | 0          | 0                 |
|                                                                                                                               | Paper-based | 0              | 3 (9.1%)   | 22 (66.7%)                    | 1 (3.0%)   | 2 (6.1%)          |
| <b>Being able to orient my body in relation to the structures helped me engage more with the neuroanatomical structures</b>   | VR          | 20 (64.5%)     | 9 (29.0%)  | 1 (3.2%)                      | 0          | 1 (3.2%)          |
|                                                                                                                               | Paper-based | 0              | 7 (21.2%)  | 19 (57.6%)                    | 0          | 2 (6.1%)          |
| <b>This method makes neuroanatomy more interesting to learn</b>                                                               | VR          | 23 (74.2%)     | 7 (22.2%)  | 1 (3.2%)                      | 0          | 0                 |
|                                                                                                                               | Paper-based | 0              | 2 (6.1%)   | 6 (18.2%)                     | 18 (54.5%) | 7 (21.2%)         |
| <b>I don't feel overwhelmed by the material presented</b>                                                                     | VR          | 12 (41.9%)     | 15 (48.4%) | 3 (9.7%)                      | 0          | 0                 |
|                                                                                                                               | Paper-based | 1 (3.0%)       | 8 (24.2%)  | 6 (18.2%)                     | 17 (51.5%) | 1 (3%)            |
| <b>I feel less anxious with the complexity of the material</b>                                                                | VR          | 8 (25.8%)      | 15 (48.4%) | 5 (16.1%)                     | 3 (9.7%)   | 0                 |
|                                                                                                                               | Paper-based | 0              | 3 (9.1%)   | 8 (24.2%)                     | 21 (63.6%) | 1 (3%)            |
| <b>I now want to learn more about neuroanatomy</b>                                                                            | VR          | 7 (22.6%)      | 17 (54.8%) | 6 (19.4%)                     | 1 (3.2%)   | 0                 |
|                                                                                                                               | Paper-based | 5 (15.2%)      | 13 (39.4%) | 7 (21.2%)                     | 6 (18.2%)  | 2 (6.1%)          |
| <b>I feel that I could be able to apply this knowledge in a clinical situation</b>                                            | VR          | 9 (29.0%)      | 12 (38.7%) | 5 (16.1%)                     | 5 (16.1%)  | 0                 |
|                                                                                                                               | Paper-based | 1 (3.0%)       | 5 (15.2%)  | 6 (18.2%)                     | 16 (48.5%) | 5 (15.2%)         |
| <b>I feel I could transfer this knowledge to interpret medical imaging</b>                                                    | VR          | 12 (38.7%)     | 15 (48.4%) | 4 (12.9%)                     | 0          | 0                 |
|                                                                                                                               | Paper-based | 1 (3.0%)       | 16 (48.5%) | 7 (21.2%)                     | 7 (21.2%)  | 2 (6.1%)          |

| Question                                                                                        | Group       | Strongly Agree | Agree      | Neither Agree<br>Nor Disagree | Disagree   | Strongly Disagree |
|-------------------------------------------------------------------------------------------------|-------------|----------------|------------|-------------------------------|------------|-------------------|
| <b>I now feel that the spatial relations between neuroanatomical structures is less complex</b> | VR          | 11 (35.5%)     | 16 (51.6%) | 1 (3.2%)                      | 3 (9.7%)   | 0                 |
|                                                                                                 | Paper-based | 0              | 5 (15.2%)  | 3 (9.1%)                      | 21 (63.6%) | 4 (12.1%)         |
| <b>This method can be used repeatedly for learning</b>                                          | VR          | 17 (54.8%)     | 13 (41.9%) | 1 (3.2%)                      | 0          | 0                 |
|                                                                                                 | Paper-based | 2 (6.1%)       | 19 (57.6%) | 8 (24.2%)                     | 2 (6.1%)   | 2 (6.1%)          |
| <b>This method helped clear any misconceptions of the material</b>                              | VR          | 10 (32.3%)     | 10 (32.3%) | 10 (32.3%)                    | 1 (3.2%)   | 0                 |
|                                                                                                 | Paper-based | 0              | 7 (21.2%)  | 7 (21.2%)                     | 15 (45.5%) | 4 (12.1%)         |
| <b>This method is an intuitive approach to learning</b>                                         | VR          | 13 (41.9%)     | 15 (48.4%) | 2 (6.5%)                      | 1 (3.2%)   | 0                 |
|                                                                                                 | Paper-based | 0              | 8 (24.2%)  | 9 (27.3%)                     | 10 (30.3%) | 6 (18.2%)         |
| <b>I can visualize in my mind the details and spatial relations of the structures</b>           | VR          | 15 (48.4%)     | 16 (51.6%) | 0                             | 0          | 0                 |
|                                                                                                 | Paper-based | 3 (9.1%)       | 11 (33.3%) | 9 (27.3%)                     | 9 (27.3%)  | 1 (3%)            |

Average scores for the test and control questions

|                                                                     | <b>Virtual-reality Average Score</b> | <b>Paper-based Average Score</b> |
|---------------------------------------------------------------------|--------------------------------------|----------------------------------|
| <b>Baseline Test Questions</b>                                      | 5.61/12                              | 5.45/12                          |
| <b>Post-intervention Test Questions</b>                             | 8.74/12                              | 8.58/12                          |
| <b>Baseline Test Questions 7-Days Post-intervention</b>             | 8.10/12                              | 6.70/12                          |
| <b>Post-intervention questions 7-Days Post-intervention</b>         | 7.77/12                              | 7.48/12                          |
| <b>Baseline Control Questions</b>                                   | 4.10/9                               | 3.45/9                           |
| <b>Post-intervention Control Questions</b>                          | 3.90/9                               | 4.03/9                           |
| <b>Baseline Control Questions 7-days Post-intervention</b>          | 3.74/9                               | 3.73/9                           |
| <b>Post-Intervention Control Questions 7-days Post-intervention</b> | 4.1/9                                | 3.82/9                           |
